# Supplementary material for: Polarization-induced nanohelixes of organic cocrystals from asymmetric components with dopant-induced chirality inversion
Source: Royal Society of Chemistry journal article supplement (doi:10.1039/d2sc05942h), 2023-01-01
Supplement: d2sc05942h1.pdf [file d2sc05942h1.pdf]

## Supporting Information

### **Polarization-Induced Nanohelices of Organic Cocrystals from Asymmetric Component and Chirality Inversion**

Jinxiu Chen,<sup>a</sup> Canglei Yang,<sup>a</sup> Shuang Ma,<sup>a</sup> Zhiqi Liu,<sup>a</sup> Wenxin Xiang,<sup>a</sup> Jing Zhang<sup>\*a</sup>

**\*Jing Zhang** - State Key Laboratory of Organic Electronics and Information Displays & Institute of Advanced Materials (IAM), Nanjing University of Posts & Telecommunications, 9 Wenyuan Road, Nanjing 210023, China;

E-mail: iamjingzhang@njupt.edu.cn.

---

## Table of Contents

|                                                                                                                                                                                      |    |
|--------------------------------------------------------------------------------------------------------------------------------------------------------------------------------------|----|
| <b>Experimental Procedures</b> .....                                                                                                                                                 | 3  |
| Materials.....                                                                                                                                                                       | 3  |
| Polymorphic Crystals Growth and Structural Analysis. ....                                                                                                                            | 3  |
| Growth of the Micro/nanocrystals on the Substrates. ....                                                                                                                             | 3  |
| Measurements.....                                                                                                                                                                    | 3  |
| <b>Results and Discussion</b> .....                                                                                                                                                  | 4  |
| <b>Figure S1.</b> Molecular structure of DBCz and TCNQ.....                                                                                                                          | 4  |
| <b>Figure S2.</b> Molecular packing pattern viewing along (102) face and $\pi$ - $\pi$ distances of different stacked columns.....                                                   | 4  |
| <b>Figure S3.</b> Alternate packing of DBCz molecules with P and M conformation .....                                                                                                | 4  |
| <b>Figure S4.</b> OM images of needle-shaped cocrystals and helical nanoribbons .....                                                                                                | 5  |
| <b>Figure S5.</b> Width, thickness and pitch distributions of helical nanoribbons .....                                                                                              | 5  |
| <b>Figure S6.</b> The crystal plane indication diagram of the cocrystal .....                                                                                                        | 6  |
| <b>Figure S7.</b> AFM image of helical crystals obtained by drop casting of the chloroform solution of DPP polymer and DBCz-TCNQ complex (5:95 mass ratio).....                      | 6  |
| <b>Figure S8.</b> CD spectra of DBCz, TCNQ and DBCz-TCNQ solutions.....                                                                                                              | 7  |
| <b>Figure S9.</b> Solution and solid-state UV-Vis absorption spectra of DBCz, TCNQ and DBCz-TCNQ samples.....                                                                        | 7  |
| <b>Figure S10.</b> OM images of helical DNF-TCNQ and DBCz-DTTCNQ nanobelts on the substrates .....                                                                                   | 7  |
| <b>Figure S11.</b> Detailed morphological changes of DNF-TCAF, DNF-TCNQ and DBCz-DTTCNQ supramolecular constructs from blend solution with varying equivalents of BCz addition. .... | 8  |
| <b>Table S1.</b> Crystal data and structure refinements for DBCz-TCNQ and DNF-TCAF cocrystal .....                                                                                   | 9  |
| <b>Table S2.</b> The surface energy of different crystal faces. ....                                                                                                                 | 10 |
| <b>Table S3.</b> The attachment energy of different crystal faces .....                                                                                                              | 10 |

---

## Experimental Procedures

**Materials.** DBCz and DNF were purchased from Aladdin Corp, TCNQ and DTTCNQ were purchased from Luminescence Technology Corp, TCAF was purchased from Sigma-Aldrich. All of them were used directly as received without further purification. All solvents were HPLC grade.

**Polymorphic Crystals Growth and Structural Analysis.** DBCz-TCNQ complexes were prepared by chloroform solution. First, dissolve the mixture of DBCz and TCNQ (molar ratio of 1:1) in chloroform to obtain a solution with a concentration of 1.8 mg/mL. After heating at 70 °C for 1 hour to ensure complete dissolution, the mixed solution was left in the air to slowly evaporate for three to four days, until the liquid completely disappeared and black needle-like crystals were finally found at the bottom of the bottle. Subsequently, the needle cocrystals were washed from the vial with petroleum ether and dried in the air. For DNF-TCAF cocrystals, they were prepared by chlorobenzene solution. First, dissolve the mixture of DNF and TCAF (molar ratio of 1:1) in chlorobenzene to obtain a solution with a concentration of 1.8 mg/mL. After heating at 70 °C for 1 hour to ensure complete dissolution, the mixed solution was then left in the air to slowly evaporate for three to four days, black needle-like crystals would be found at the bottom of the bottle. The Bruker smart-1000-CCD diffractometer with graphite-monochromatic Mo  $K\alpha$  radiation ( $\lambda = 0.71073 \text{ \AA}$ ) was used to measure the crystal structures of single crystals. X-ray crystallography data was collected at room temperature. The structure was resolved by the direct method and refined by the full-matrix least-squares method on  $F^2$  using the SHELXL-97 program.

**Growth of the Micro/nanocrystals on the Substrates.** In order to grow micro/nano crystals on the substrate, an acetonitrile solution (1.8 mg/mL) containing DBCz and TCNQ in a molar ratio of 1:1 was drop-casted onto the  $\text{SiO}_2/\text{Si}$  substrate; an chlorobenzene solution (1.8 mg/mL) containing DNF and TCAF in a molar ratio of 1:1 was drop-casted onto the  $\text{SiO}_2/\text{Si}$  substrate. As the solvent evaporating, belt-shaped crystal was prepared on the substrate.

**Measurements.** The nanostructures of the complex were characterized by optical microscopy (BX53, Olympus), UV-visible absorption spectrum (LAMBDA 35), circular dichroism spectrum (JASCO, J-815), Atomic force microscopy (Bruker Dimension Icon), Scanning electron microscope (Bruker, S4800), Transmission electronic microscopy (HITACHI HT7700) and corresponding selected-area electron diffraction (HITACHI HT7700). PXRD was measured on a D/max2500 with Cu  $K\alpha$  source ( $\kappa = 1.541 \text{ \AA}$ ).

**The elastic energy of nanocrystals.** The corresponding elastic energy of the helical nanobelts:

$$\Delta E_{\text{elastic}} \approx \frac{\pi W Y}{24R} t^3 \quad \textcircled{1}$$

$$\Delta E \approx \Delta E_{\text{electro}} + \Delta E_{\text{elastic}} \quad \textcircled{2}$$

The  $R$  value is approximately taken as  $W/2$ . Equation ① is the elastic energy, and  $Y$  is the banding modulus. In order to maintain the helical morphology of the crystal, the elastic energy should be smaller than that of electrostatic energy, so that the total energy  $\Delta E$  calculated by Equation ② is less than 0. A large  $\sigma$  will induce a large-scale twisting structure.

## Results and Discussion

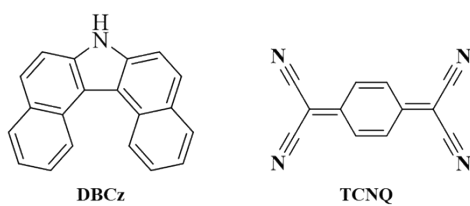

Figure S1. Molecular structure of DBCz and TCNQ.

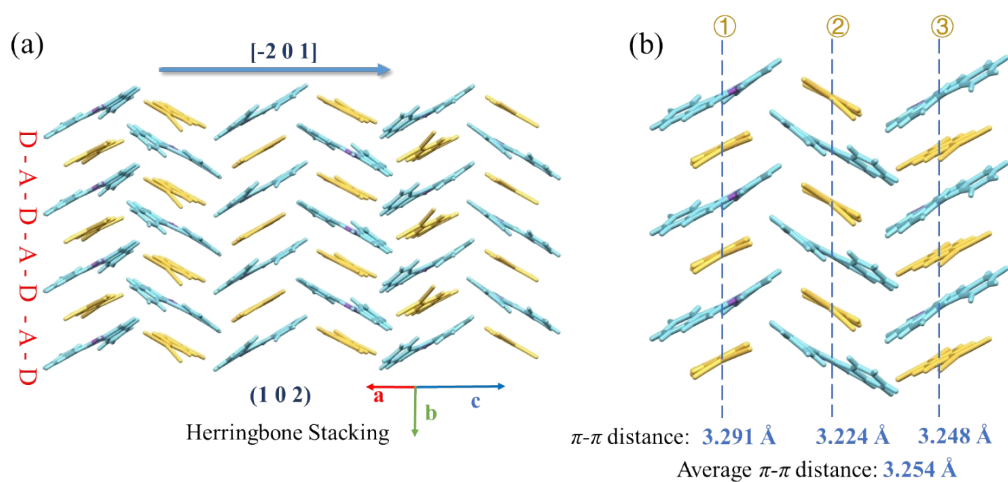

Figure S2. (a) Molecular packing pattern viewing along (102) face and (b)  $\pi$ - $\pi$  distances in different stacked columns.

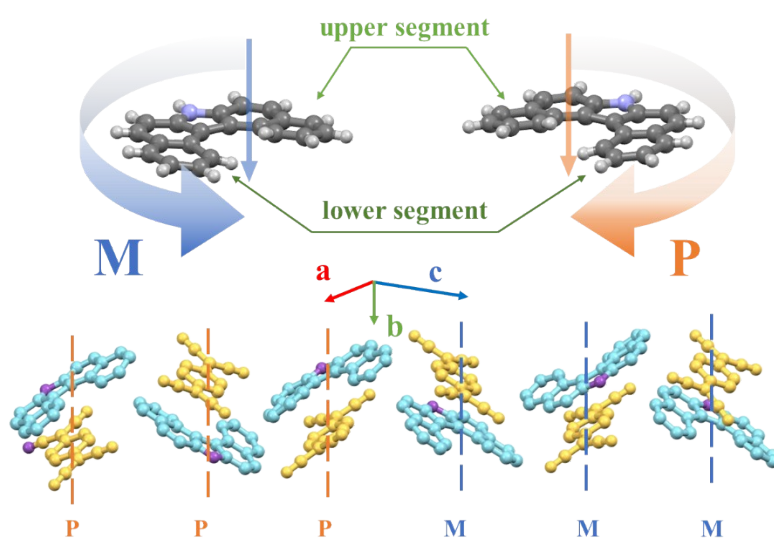

Figure S3. Alternate packing of DBCz molecules with P and M conformation.

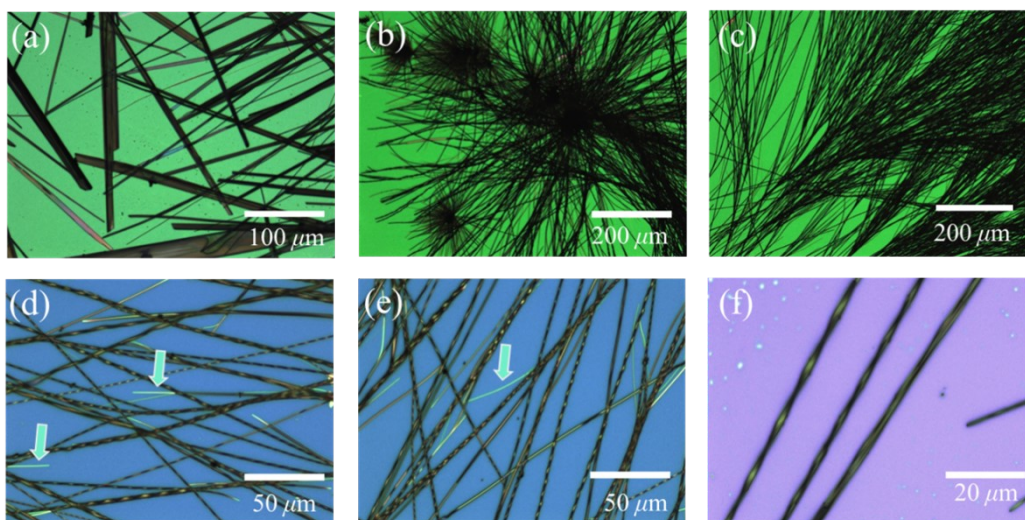

**Figure S4.** OM images of needle-shaped cococrystals and helical nanoribbons. Inside thin crystals at the green arrow were attached to the substrate.

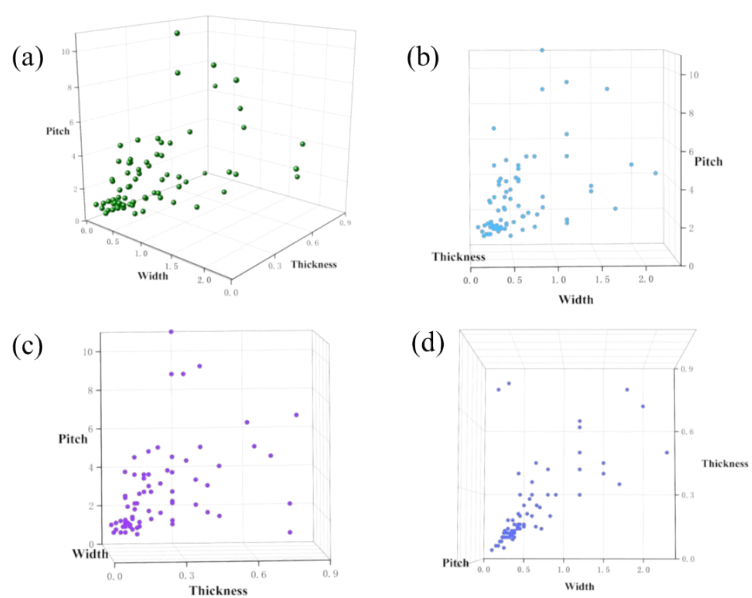

**Figure S5.** Width, thickness and pitch distributions of helical nanoribbons.

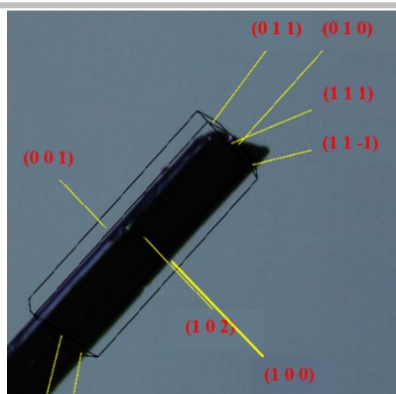

**Figure S6.** The crystal plane indication diagram of the crystal obtained by single crystal XRD.

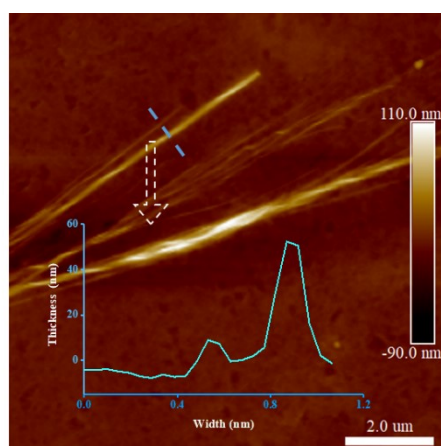

**Figure S7.** AFM image of helical crystals obtained by drop casting of the chloroform solution of DPP polymer and DBCz-TCNQ complex (5:95 mass ratio) on the substrate.

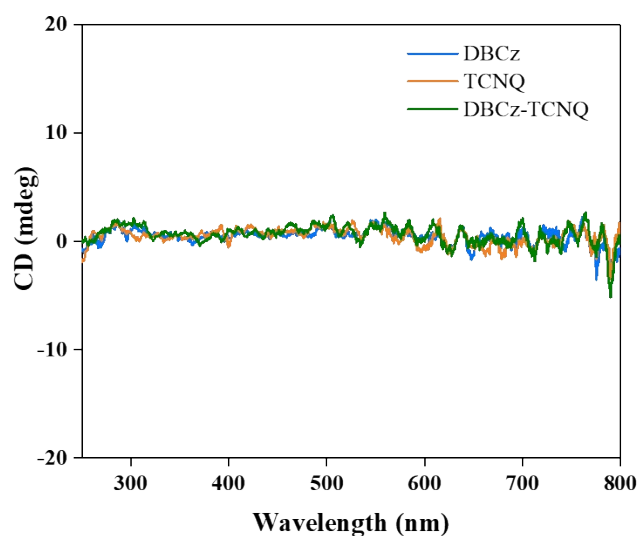

**Figure S8.** CD spectra of DBCz, TCNQ and DBCz-TCNQ solution.

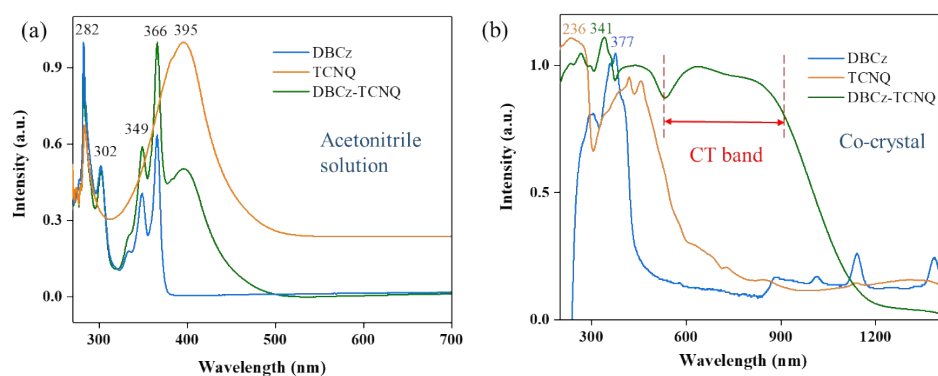

**Figure S9.** (a) UV-Vis absorption spectra of DBCz, TCNQ and DBCz-TCNQ solutions and (b) solid-state UV-Vis absorption spectra of DBCz, TCNQ powder and DBCz-TCNQ crystals.

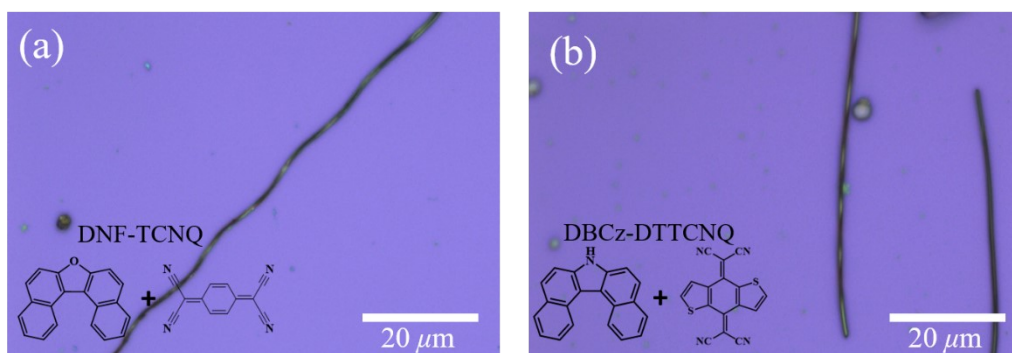

**Figure S10.** OM images of helical (a) DNF-TCNQ and (b) DBCz-DTTCNQ nanobelts on the substrates.

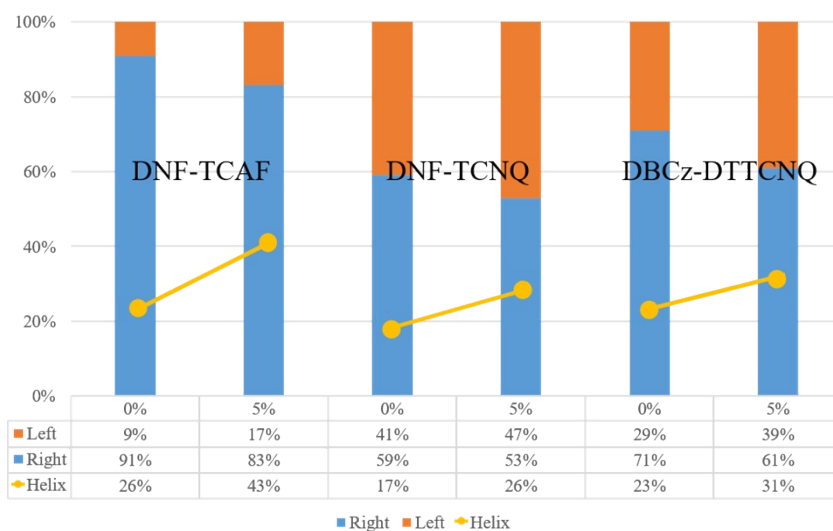

**Figure S11.** Detailed morphological changes of DNF-TCAF, DNF-TCNQ and DBCz-DTTCNQ supramolecular constructs from blend solution with varying equivalents of BCz addition.



**Table S1.** Crystal data and structure refinements for DBCz-TCNQ and DNF-TCAF cocrystals.

|                                            | DBCz-TCNQ                                                         | DNF-TCAF                                                          |
|--------------------------------------------|-------------------------------------------------------------------|-------------------------------------------------------------------|
| Formula                                    | C <sub>32</sub> H <sub>17</sub> N <sub>5</sub>                    | C <sub>36</sub> H <sub>16</sub> N <sub>6</sub> O                  |
| Formula weight                             | 471.50                                                            | 548.55                                                            |
| Temperature (K)                            | 150                                                               | 296                                                               |
| Wavelength (Å)                             | 1.542                                                             | 1.367                                                             |
| Crystal system                             | Monoclinic                                                        | Triclinic                                                         |
| space group                                | <i>Pc</i>                                                         | <i>P1</i>                                                         |
| <b>Unit cell dimensions</b>                |                                                                   |                                                                   |
| <i>a</i> (Å)                               | 11.1150(6)                                                        | 7.023(10)                                                         |
| <i>b</i> (Å)                               | 7.4032(5)                                                         | 9.909(14)                                                         |
| <i>c</i> (Å)                               | 41.998(3)                                                         | 11.109(14)                                                        |
| $\alpha$ (°)                               | 90                                                                | 65.89(6)                                                          |
| $\beta$ (°)                                | 93.750(5)                                                         | 74.66(5)                                                          |
| $\gamma$ (°)                               | 90                                                                | 73.28(4)                                                          |
| Volume (Å <sup>3</sup> )                   | 3448.5(4)                                                         | 666.3(16)                                                         |
| <i>Z</i>                                   | 6                                                                 | 1                                                                 |
| Absorption coefficient (mm <sup>-1</sup> ) | 0.653                                                             | 0.086                                                             |
| <i>F</i> (000)                             | 1464.0                                                            | 282.0                                                             |
| Crystal size (mm)                          | 0.13 × 0.11 × 0.1                                                 | 0.12 × 0.11 × 0.1                                                 |
| $\theta$ range (°)                         | 7.972 to 140.090                                                  | 6.144 to 56.626                                                   |
| Limiting indices                           | -13 ≤ <i>h</i> ≤ 13<br>-8 ≤ <i>k</i> ≤ 8<br>-50 ≤ <i>l</i> ≤ 51   | -9 ≤ <i>h</i> ≤ 9<br>-11 ≤ <i>k</i> ≤ 13<br>-10 ≤ <i>l</i> ≤ 14   |
| Reflections collected                      | 22382                                                             | 5431                                                              |
| <i>R</i> (int)                             | 0.0865                                                            | 0.0240                                                            |
| Absorption correction                      | Semi-empirical from equivalents                                   | Semi-empirical from equivalents                                   |
| Refinement method                          | Full-matrix least-squares on F <sup>2</sup>                       | Full-matrix least-squares on F <sup>2</sup>                       |
| Data / restraints / parameters             | 11241/3/1008                                                      | 3940/71/388                                                       |
| <i>R</i> [ <i>I</i> > 2σ( <i>I</i> )]      | <i>R</i> <sub>1</sub> = 0.0684<br><i>wR</i> <sub>2</sub> = 0.1663 | <i>R</i> <sub>1</sub> = 0.0842<br><i>wR</i> <sub>2</sub> = 0.1921 |
| <i>R</i> (all data)                        | <i>R</i> <sub>1</sub> = 0.0980<br><i>wR</i> <sub>2</sub> = 0.1892 | <i>R</i> <sub>1</sub> = 0.1123<br><i>wR</i> <sub>2</sub> = 0.2096 |
| CCDC NO.                                   | 2169110                                                           | 2214872                                                           |

**Table S2.** The surface energy of different crystal faces.

| <i>hkl</i> | Surface Energy (kcal/mol) |
|------------|---------------------------|
| {102}      | 55.925                    |
| {100}      | 79.967                    |
| {002}      | 101.354                   |
| {-102}     | 132.433                   |
| {110}      | 167.719                   |
| {013}      | 168.702                   |
| {011}      | 169.612                   |
| {010}      | 173.799                   |

**Table S3.** The attachment energy of different crystal faces in cocrystal.

| <i>hkl</i> | Attachment Energy (kcal/mol) |
|------------|------------------------------|
| {002}      | -33.360                      |
| {102}      | -40.359                      |
| {100}      | -49.679                      |
| {10-2}     | -90.360                      |
| {011}      | -158.714                     |
| {010}      | 160.170                      |
